# Supplementary material for: A systematic comparison of recurrent event models for application to composite endpoints
Source: Springer Nature journal article supplement (doi:10.1186/s12874-017-0462-x), 2018-01-04
Supplement: MOESM1 [file 15344776]

## RESEARCH

# Additional File to the Article 'A Systematic Comparison of Recurrent Event Models for Application to Composite Endpoints'

Ann-Kathrin Ozga<sup>1,2\*</sup>, Meinhard Kieser<sup>2</sup> and Geraldine Rauch<sup>2,3</sup>

\*Correspondence: a.ozga@uke.de

<sup>1</sup> Institute of Medical Biometry and Epidemiology, University Medical Center

Hamburg-Eppendorf, Martinistraße 52, 20246 Hamburg, Germany

Full list of author information is available at the end of the article

## Implementation in R

To illustrate how the analysis of recurrent event data with the models of Andersen and Gill [1], Prentice, Williams, and Peterson [2], and Wei, Lin, and Weissfeld [3] can be performed by application of the statistical software R, we will provide the corresponding program code for a small exemplary data set named *DataRec*:

Individual 1 belongs to group 1, experiences three non-fatal events at months 2, 3, 5, and is censored at month 8; individual 2 is in group 1, experiences no event and is censored at month 10; individual 3 belongs to group 2, experiences events at months 1 and 6 and is censored at months 10. We assume a common study start for each individual at time point 0.

### Implementation of the Anderson-Gill model

The required data frame for the Anderson-Gill model [1] is given in Table 1.

**Table 1** Data frame for AG model

| ID | group | start | stop | status |
|----|-------|-------|------|--------|
| 1  | 1     | 0     | 2    | 1      |
| 1  | 1     | 2     | 3    | 1      |
| 1  | 1     | 3     | 5    | 1      |
| 1  | 1     | 5     | 8    | 0      |
| 2  | 1     | 0     | 10   | 0      |
| 3  | 2     | 0     | 1    | 1      |
| 3  | 2     | 1     | 6    | 1      |
| 3  | 2     | 6     | 10   | 0      |

Data frame as required for the Andersen-Gill model; *ID*: patient ID, *group*: treatment group; *start*: study entry time/previous event time; *stop*: event/censoring times; *status*: event indicator

The R code to apply the Andersen-Gill model to the data set *DataRec* is given as

$$\text{coxph}(\text{Surv}(\text{start}, \text{stop}, \text{status}) \sim \text{group} + \text{cluster}(\text{ID}), \text{data} = \text{DataRec})$$

Thereby, the `coxph` function of the `survival` package [4] is used and `cluster(ID)` requests robust standard errors for the parameter estimates to account for individual patient heterogeneity.

### Implementation of the Prentice-Williams-Peterson models

The stratified model from Prentice, Williams, and Peterson [2] based on the total time scale can be applied using the data frame as displayed in Table 2.

**Table 2** Data frame for the PWP total time approach

| ID | group | start | stop | status | enum |
|----|-------|-------|------|--------|------|
| 1  | 1     | 0     | 2    | 1      | 1    |
| 1  | 1     | 2     | 3    | 1      | 2    |
| 1  | 1     | 3     | 5    | 1      | 3    |
| 1  | 1     | 5     | 8    | 0      | 4    |
| 2  | 1     | 0     | 10   | 0      | 1    |
| 3  | 2     | 0     | 1    | 1      | 1    |
| 3  | 2     | 1     | 6    | 1      | 2    |
| 3  | 2     | 6     | 10   | 0      | 3    |

Data frame as required for the Prentice-Williams-Peterson total time model; *ID*: patient ID, *group*: treatment group; *start*: study entry time/previous event time; *stop*: event/censoring times; *status*: event indicator; *enum*: indicator for the stratum

The corresponding R code is given as

$$\text{coxph}(\text{Surv}(\text{start}, \text{stop}, \text{status}) \sim \text{group} + \text{cluster}(\text{ID}) + \text{strata}(\text{enum}), \text{data} = \text{DataRec})$$

The stratified model from Prentice, Williams, and Peterson [2] based on the gap time scale can be applied using the data frame as displayed in Table 3.

**Table 3** Data frame for the PWP gap time approach

| ID | group | start | stop | status | enum |
|----|-------|-------|------|--------|------|
| 1  | 1     | 0     | 2    | 1      | 1    |
| 1  | 1     | 0     | 1    | 1      | 2    |
| 1  | 1     | 0     | 2    | 1      | 3    |
| 1  | 1     | 0     | 3    | 0      | 4    |
| 2  | 1     | 0     | 10   | 0      | 1    |
| 3  | 2     | 0     | 1    | 1      | 1    |
| 3  | 2     | 0     | 5    | 1      | 2    |
| 3  | 2     | 0     | 4    | 0      | 3    |

Data frame as required for the Prentice-Williams-Peterson gap time model; *ID*: patient ID, *group*: treatment group; *start*: study entry time/previous event time; *stop*: event/censoring times; *status*: event indicator; *enum*: indicator for the stratum

The corresponding R code is given as

$$\text{coxph}(\text{Surv}(\text{start}, \text{stop}, \text{status}) \sim \text{group} + \text{cluster}(\text{ID}) + \text{strata}(\text{enum}), \text{data} = \text{DataRec})$$

### Implementation of the Wei-Lin-Weissfeld model

The stratified model from Wei, Lin, and Weissfeld [3] can be applied using the data frame as displayed in Table 4.

**Table 4** Data frame for the WLW model

| ID | group | start | stop | status | enum |
|----|-------|-------|------|--------|------|
| 1  | 1     | 0     | 2    | 1      | 1    |
| 1  | 1     | 2     | 3    | 1      | 2    |
| 1  | 1     | 3     | 5    | 1      | 3    |
| 2  | 1     | 0     | 10   | 0      | 1    |
| 2  | 1     | 0     | 10   | 0      | 2    |
| 2  | 1     | 0     | 10   | 0      | 3    |
| 3  | 2     | 0     | 1    | 1      | 1    |
| 3  | 2     | 1     | 6    | 1      | 2    |
| 3  | 2     | 6     | 10   | 0      | 3    |

Data frame as required for the Wei-Lin-Weissfeld model; *ID*: patient ID, *group*: treatment group; *start*: study entry time/previous event time; *stop*: event/censoring times; *status*: event indicator; *enum*: indicator for the stratum

The corresponding R code is given as

```
coxph(Surv(start, stop, status) ~ group+cluster(ID)+strata(enum), data = DataRec)
```

### **Bayesian Information Criterion for all simulated scenarios concerning the results in Table 2 of the Manuscript**

In Table 5 the mean Bayesian Information Criterion [5] over 5000 simulations per scenario is given for all simulated situations listed in Table 2 of the main manuscript.

**Table 5 Simulation Results: BIC**

| Simulation parameters |                                |                                |                                       |                                       |                       |                         |                         |                        |  |
|-----------------------|--------------------------------|--------------------------------|---------------------------------------|---------------------------------------|-----------------------|-------------------------|-------------------------|------------------------|--|
| Sc.                   | $\lambda_0^{MI}(t, t_{prev})$  | $\lambda_0^D(t, t_{prev})$     | $exp(\beta^{MI}(t_{prev}))$           | $exp(\beta^D(t_{prev}))$              | $\overline{BIC}_{AG}$ | $\overline{BIC}_{PWP1}$ | $\overline{BIC}_{PWP2}$ | $\overline{BIC}_{WLW}$ |  |
| 1a                    | 0.25                           | 0.25                           | 0.5                                   | 0.5                                   | 727.93                | 659.21                  | 700.38                  | 727.73                 |  |
| 1b                    | 0.25                           | 0.25                           | 0.5                                   | 0.7                                   | 726.73                | 658.45                  | 699.75                  | 727.29                 |  |
| 1c                    | 0.25                           | 0.25                           | 0.7                                   | 0.5                                   | 831.11                | 750.06                  | 797.12                  | 828.85                 |  |
| 1d                    | 0.25                           | 0.25                           | 0.7                                   | 1.5                                   | 820.95                | 743.27                  | 791.23                  | 823.88                 |  |
| 1e                    | 0.25                           | 0.25                           | 1.5                                   | 0.7                                   | 1206.35               | 1061.61                 | 1128.26                 | 1184.12                |  |
| 2a                    | $0.25 \cdot 1/\sqrt{t_{prev}}$ | $0.25 \cdot 1/\sqrt{t_{prev}}$ | 0.5                                   | 0.5                                   | 685.26                | 637.10                  | 675.74                  | 687.64                 |  |
| 2b                    | $0.25 \cdot 1/\sqrt{t_{prev}}$ | $0.25 \cdot 1/\sqrt{t_{prev}}$ | 0.5                                   | 0.7                                   | 684.30                | 636.52                  | 675.30                  | 687.41                 |  |
| 2c                    | $0.25 \cdot 1/\sqrt{t_{prev}}$ | $0.25 \cdot 1/\sqrt{t_{prev}}$ | 0.7                                   | 0.5                                   | 784.87                | 725.59                  | 770.12                  | 785.65                 |  |
| 2d                    | $0.25 \cdot 1/\sqrt{t_{prev}}$ | $0.25 \cdot 1/\sqrt{t_{prev}}$ | 0.7                                   | 1.5                                   | 776.49                | 720.20                  | 765.71                  | 782.26                 |  |
| 2e                    | $0.25 \cdot 1/\sqrt{t_{prev}}$ | $0.25 \cdot 1/\sqrt{t_{prev}}$ | 1.5                                   | 0.7                                   | 1133.92               | 1016.61                 | 1087.30                 | 1120.17                |  |
| 3a                    | $t^{0.3}$                      | $t^{0.3}$                      | 0.5                                   | 0.5                                   | 2232.49               | 1809.78                 | 1983.16                 | 2121.24                |  |
| 3b                    | $t^{0.3}$                      | $t^{0.3}$                      | 0.5                                   | 0.7                                   | 2200.92               | 1788.45                 | 1961.25                 | 2100.93                |  |
| 3c                    | $t^{0.3}$                      | $t^{0.3}$                      | 0.7                                   | 0.5                                   | 2550.04               | 2050.49                 | 2253.46                 | 2404.13                |  |
| 3d                    | $t^{0.3}$                      | $t^{0.3}$                      | 0.7                                   | 1.5                                   | 2342.49               | 1906.77                 | 2106.54                 | 2260.55                |  |
| 3e                    | $t^{0.3}$                      | $t^{0.3}$                      | 1.5                                   | 0.7                                   | 3549.93               | 2672.83                 | 3037.22                 | 3243.98                |  |
| 3f                    | $1.5t^{0.3}$                   | $t^{0.3}$                      | 0.5                                   | 0.5                                   | 3231.42               | 2443.76                 | 2755.38                 | 2948.67                |  |
| 4a                    | 0.25                           | 0.25                           | $0.5exp(0.05ln(0.5) \cdot t_{prev})$  | $0.5exp(0.05ln(0.5) \cdot t_{prev})$  | 723.04                | 656.17                  | 696.99                  | 722.93                 |  |
| 4b                    | 0.25                           | 0.25                           | $0.5exp(0.05ln(0.5) \cdot t_{prev})$  | $0.7exp(0.05ln(0.5) \cdot t_{prev})$  | 721.99                | 655.51                  | 696.46                  | 722.63                 |  |
| 4c                    | 0.25                           | 0.25                           | $0.7exp(0.05ln(0.7) \cdot t_{prev})$  | $0.5exp(0.05ln(0.5) \cdot t_{prev})$  | 827.15                | 747.72                  | 794.42                  | 824.96                 |  |
| 4d                    | 0.25                           | 0.25                           | $0.7exp(0.05ln(0.7) \cdot t_{prev})$  | $1.5exp(0.05ln(0.5) \cdot t_{prev})$  | 817.47                | 741.24                  | 788.97                  | 820.49                 |  |
| 4e                    | 0.25                           | 0.25                           | $1.5exp(0.05ln(1.5) \cdot t_{prev})$  | $0.7exp(0.05ln(0.5) \cdot t_{prev})$  | 1218.22               | 1062.07                 | 1136.19                 | 1195.38                |  |
| 5a                    | 0.25                           | 0.25                           | $0.5exp(-0.05ln(0.5) \cdot t_{prev})$ | $0.5exp(-0.05ln(0.5) \cdot t_{prev})$ | 734.93                | 663.46                  | 705.21                  | 734.66                 |  |
| 5b                    | 0.25                           | 0.25                           | $0.5exp(-0.05ln(0.5) \cdot t_{prev})$ | $0.7exp(-0.05ln(0.5) \cdot t_{prev})$ | 733.53                | 662.60                  | 704.40                  | 734.02                 |  |
| 5c                    | 0.25                           | 0.25                           | $0.7exp(-0.05ln(0.7) \cdot t_{prev})$ | $0.5exp(-0.05ln(0.5) \cdot t_{prev})$ | 835.39                | 752.59                  | 800.08                  | 833.07                 |  |
| 5d                    | 0.25                           | 0.25                           | $0.7exp(-0.05ln(0.7) \cdot t_{prev})$ | $1.5exp(-0.05ln(0.5) \cdot t_{prev})$ | 824.90                | 745.59                  | 793.81                  | 827.73                 |  |
| 5e                    | 0.25                           | 0.25                           | $1.5exp(-0.05ln(1.5) \cdot t_{prev})$ | $0.7exp(-0.05ln(0.5) \cdot t_{prev})$ | 1195.39               | 1048.44                 | 1120.97                 | 1173.75                |  |
| 5f                    | 0.25                           | 0.25                           | $0.5exp(-0.5ln(0.5) \cdot t_{prev})$  | $0.5exp(-0.5ln(0.5) \cdot t_{prev})$  | 808.66                | 699.74                  | 757.05                  | 809.83                 |  |

Mean Bayesian Information Criterion (BIC) over 5000 simulations for all corresponding simulated scenarios of Table 2 of the manuscript for the Andersen-Gill model (AG), the Prentice-Williams-Peterson total time model (PWP1), the Prentice-Williams-Peterson gap time model (PWP2), the Wei-Lin-Weissfeld model (WLW);  $\lambda_0^{MI}(t, t_{prev})$  baseline hazard function for the recurrent event (myocardial infarction);  $\lambda_0^D(t, t_{prev})$  baseline hazard function for the fatal event (death);  $exp(\beta^{MI}(t_{prev}))$  hazard ratio for the recurrent event (myocardial infarction);  $exp(\beta^D(t_{prev}))$  hazard ratio for the fatal event (death).

**Author details**

<sup>1</sup> Institute of Medical Biometry and Epidemiology, University Medical Center Hamburg-Eppendorf, Martinstraße 52, 20246 Hamburg, Germany. <sup>2</sup> Institute of Medical Biometry and Informatics, University Medical Center Ruprecht-Karls University Heidelberg, Im Neuenheimer Feld 130.3, 69120 Heidelberg, Germany. <sup>3</sup> Charité - Universitätsmedizin Berlin, corporate member of Freie Universität Berlin, Humboldt-Universität zu Berlin, and Berlin Institute of Health, Institute of Biometry and Clinical Epidemiology, Charitéplatz 1, 10117 Berlin, Germany.

**References**

1. Andersen, P.K., Gill, R.D.: Cox's regression model for counting processes: A large sample study. *The Annals of Statistics* **10(4)**, 1100–1120 (1982)
2. Prentice, R.L., Williams, B.J., Peterson, A.V.: On the regression analysis of multivariate failure time data. *Biometrika* **68(2)**, 373–379 (1981)
3. Wei, L.J., Lin, D.Y., Weissfeld, L.: Analysis of multivariate incomplete failure time data by modeling marginal distributions. *Biometrika* **84(408)**, 1065–1073 (1989)
4. Therneau, T.M.: *Survival Package, Software R.* (2017). Version 2.41-3, <https://CRAN.R-project.org/package=survival>
5. Schwarz, G.: *Estimating the dimension of a model.* *The Annals of Statistics* **6(2)**, 461–464 (1978)
